# Supplementary material
Source: publisher figshare collection journal article supplement (https://tandf.figshare.com/ndownloader/files/17915876)
Supplement: Supplementary file 1 [file 17915876]

## Supplementary Material

### **Dynamic-mechanical thermoanalysis test: a rapid alternative for accelerated freeze-thaw stability evaluation of W/O emulsions**

Nebojsa D. Cekic<sup>a,b,\*</sup>, Sanela M. Savic<sup>a</sup>, Snezana D. Savic<sup>c</sup>

<sup>a</sup> *DCP Hemigal, Leskovac, Serbia*

<sup>b</sup> *Faculty of Technology, University of Nis, Leskovac, Serbia*

<sup>c</sup> *Department of Pharmaceutical Technology and Cosmetology, Faculty of Pharmacy, University of Belgrade, Belgrade, Serbia*

**\*Corresponding author:** Nebojsa D. Cekic, DCP Hemigal, Tekstilna 97, 16000 Leskovac, Serbia; Faculty of Technology, University of Nis, Bulevar Oslobođenja 124, 16000 Leskovac, Serbia; E-mail: [nesafarm@gmail.com](mailto:nesafarm@gmail.com).

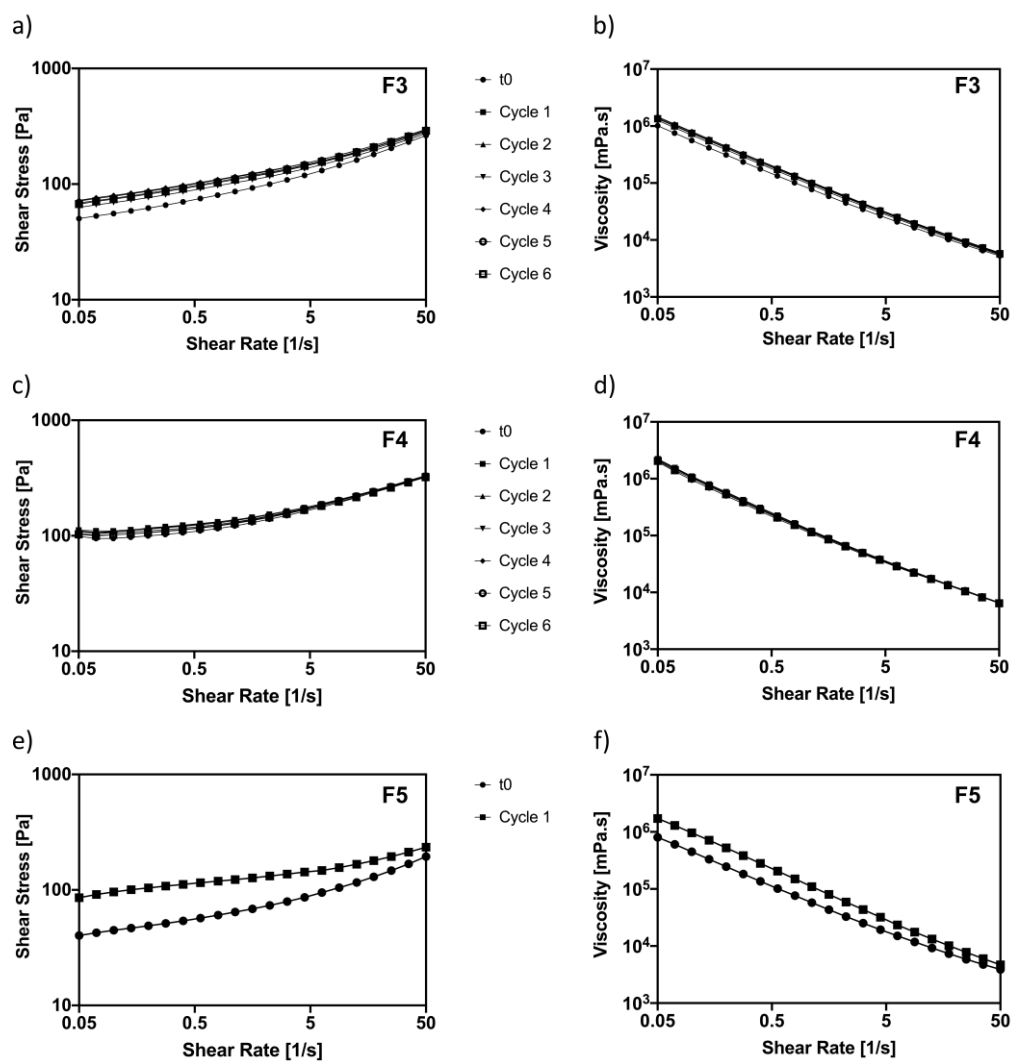

**Figure S1.** Flow curves (a, c, e) and viscosity curves (b, d, f) of model formulations F3, F4 and F5, 48 h after preparation ( $t_0$ ) and after each freeze-thaw cycle

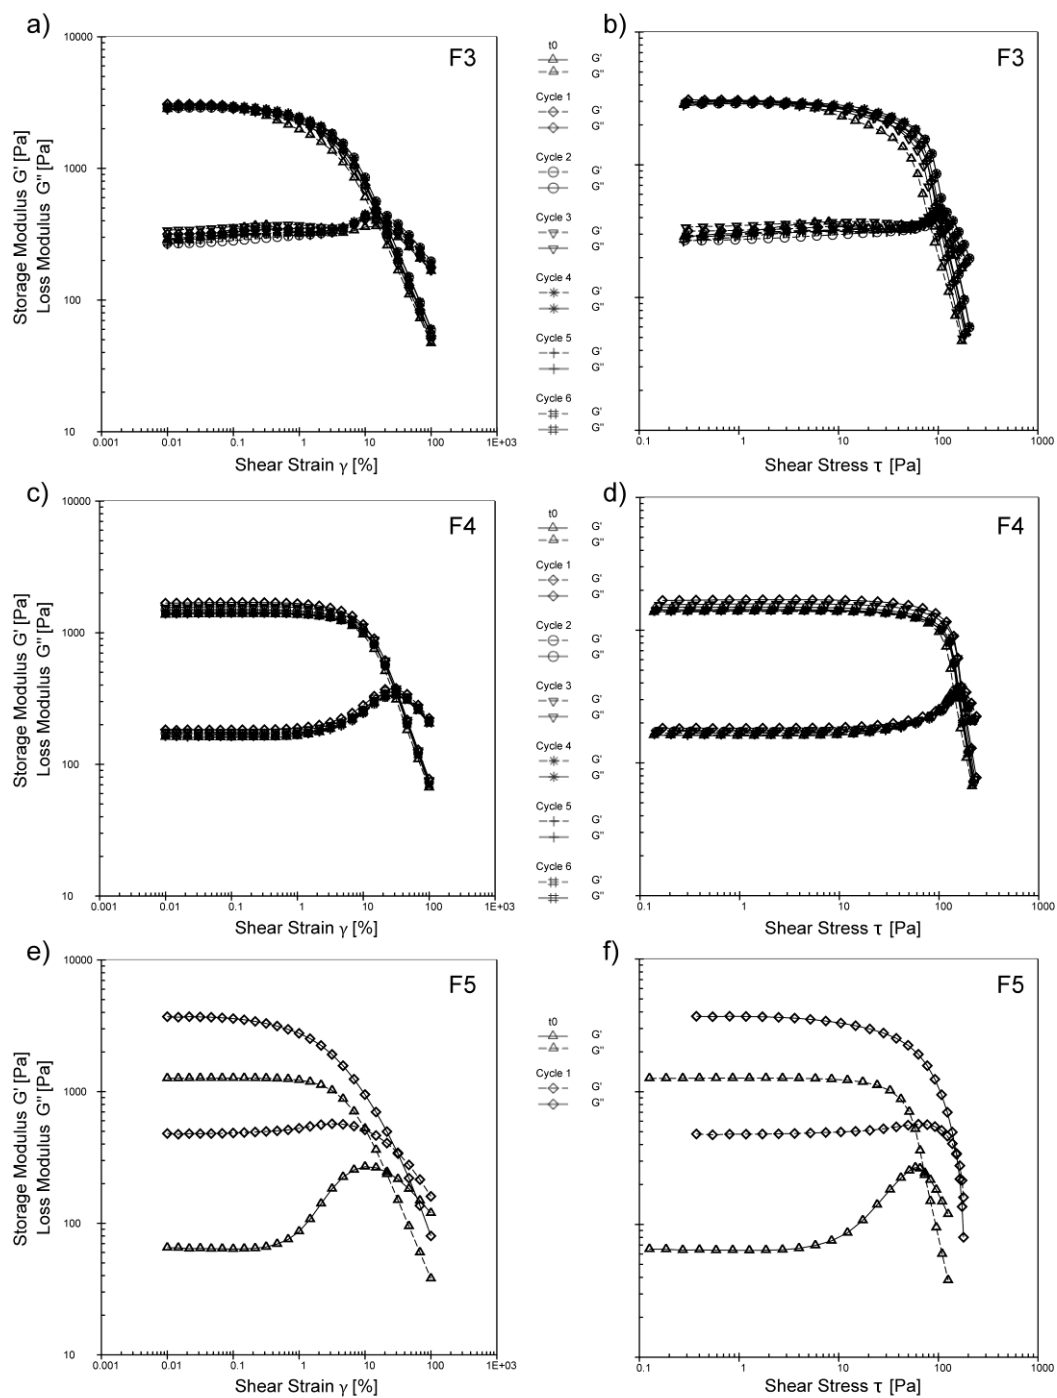

**Figure S2.** Amplitude sweeps of model formulations F3, F4 and F5, 48 h after preparation ( $t_0$ ) and after each freeze-thaw cycle; storage and loss moduli vs. shear strain (a, c, e), and storage and loss moduli vs. shear stress (b, d, f)

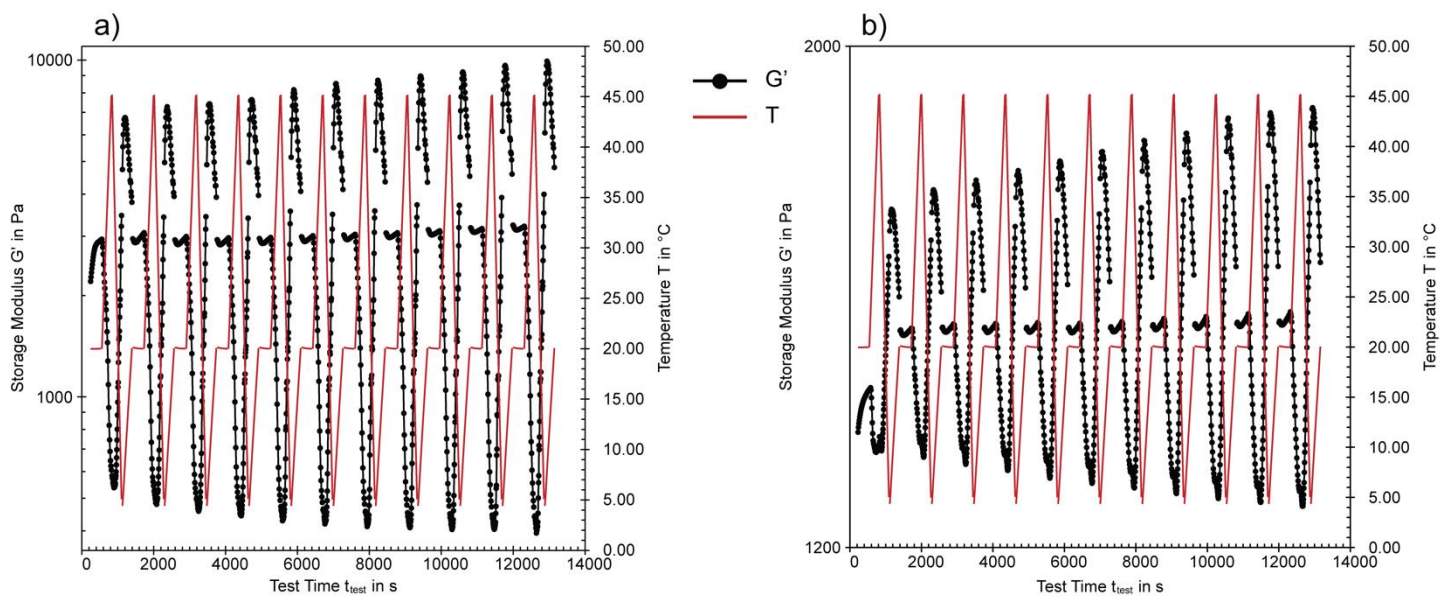

**Figure S3.** Change of storage modulus ( $G'$ ) in dynamic-mechanical thermoanalysis (DMTA) test for model formulations F3 (a) and F4 (b) in the temperature range of 5 $^{\circ}\text{C}$ –45 $^{\circ}\text{C}$
